# Supplementary material for: Facile synthesis of Pt–Pd nanodendrites and their superior electrocatalytic activity
Source: Royal Society of Chemistry journal article supplement (doi:10.1039/c3ta14304j), 2014-01-01
Supplement: c3ta14304j.pdf [file c3ta14304j.pdf]

## Supplementary Information

### **Facile synthesis of Pt-Pd nanodendrites and their superior electrocatalytic activity**

Jing-Jing Lv, Jie-Ning Zheng, Shan-Shan Li, Li-Li Chen, Ai-Jun Wang\*, Jiu-Ju Feng\*

*College of Geography and Environmental Science, College of Chemistry and Life Science,  
Zhejiang Normal University, Jinhua 321004, China*

*\*Corresponding author: jjfeng@zjnu.cn (JJF), ajwang@zjnu.cn (AJW); Tel./Fax: +86 579  
82282269.*

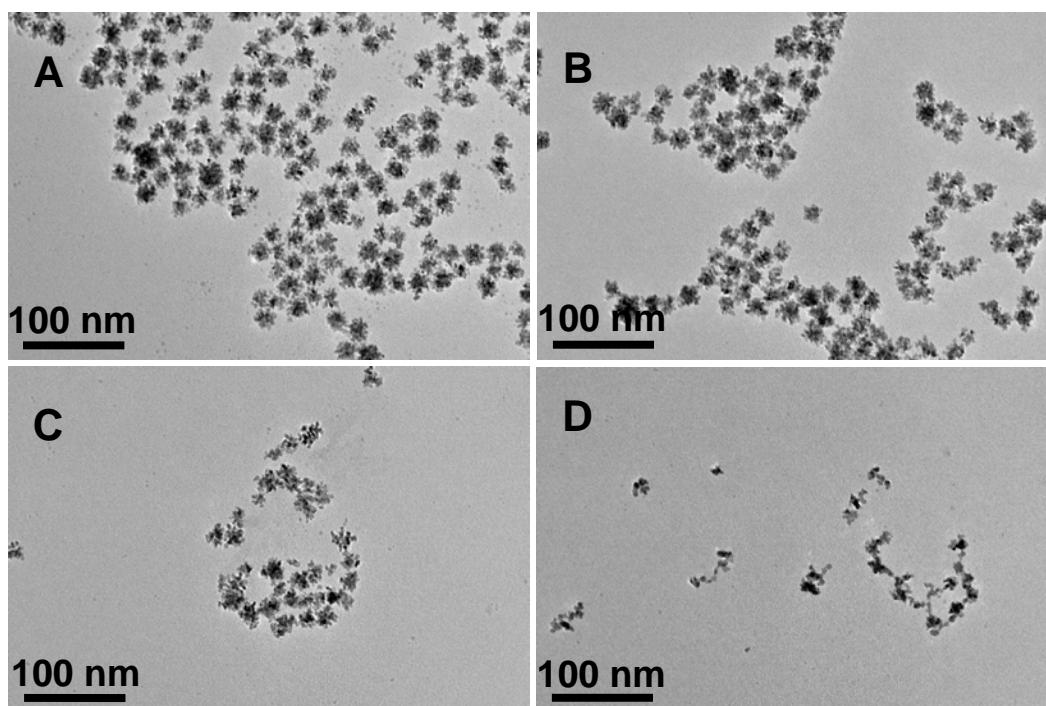

**Fig. S1** TEM images of the products collected at different temperature: 25 °C (A), 40 °C (B), 60 °C (C), and 80 °C (D).

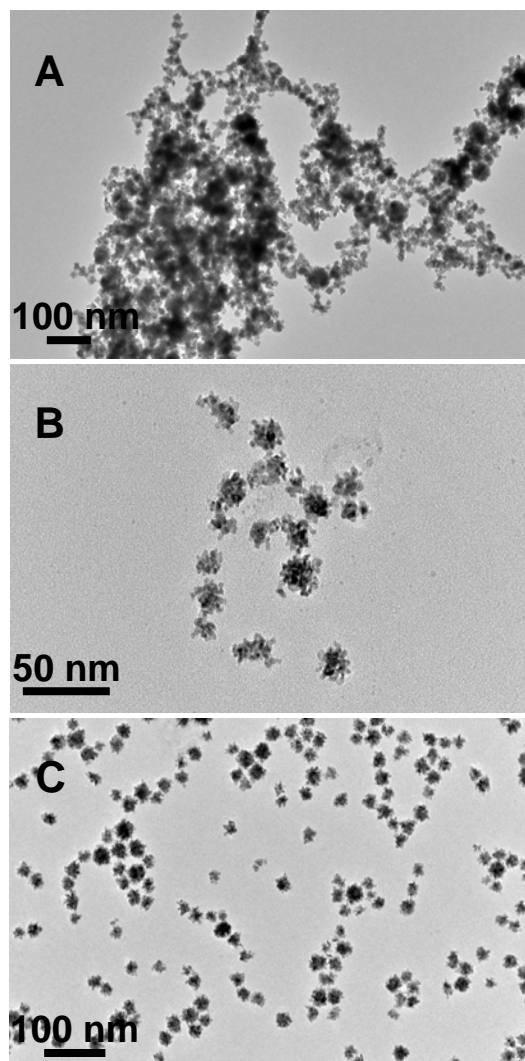

**Fig. S2** TEM images of the products collected in the absence (A), and presence of 0.1% (B) and 0.5% (C) PVP.

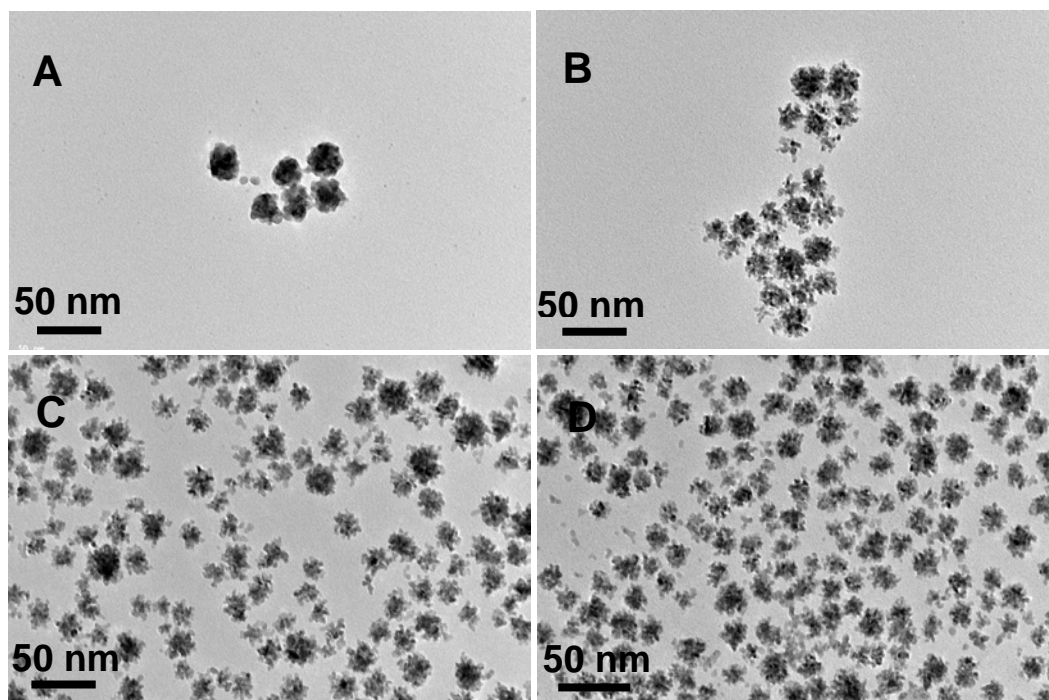

**Fig. S3** TEM images of the products collected without (A), and with 2.5 mM (B), 10 mM (C), and 50 mM (D) urea.

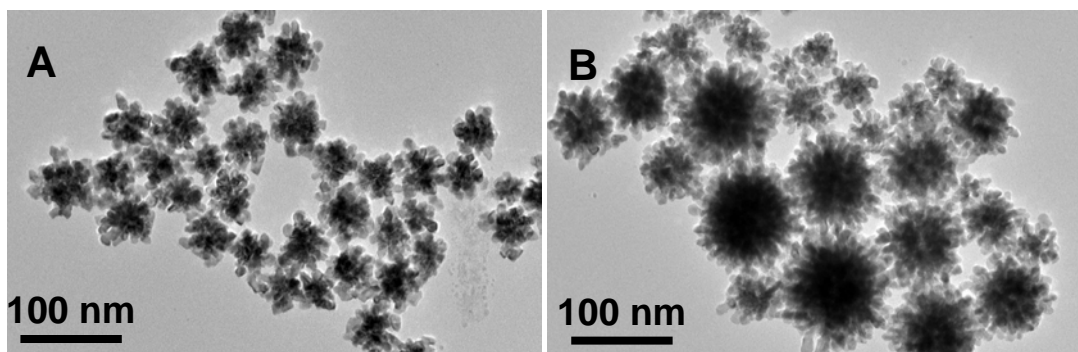

**Fig. S4** TEM images of the products collected in the reaction system with different pH values: 2.0 (A) and 7.0 (B).

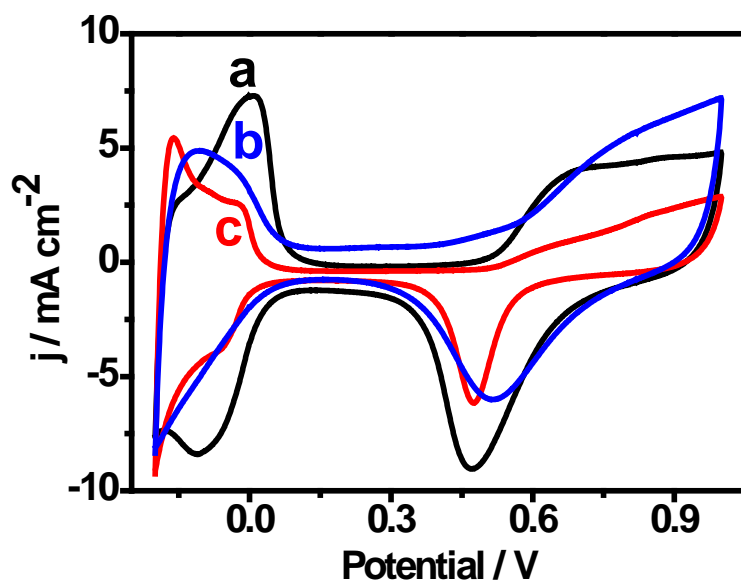

**Fig. S5** Cyclic voltammograms of the Pt-Pd NDs (curve a), Pt black (curve b), and Pd black (curve c) catalysts modified electrodes in 0.5 M  $\text{H}_2\text{SO}_4$  at a scan rate of 50  $\text{mV s}^{-1}$ .
